# Supplementary material
Source: PubMed Central journal article supplement (PMC5777864)
Supplement: NIHMS922652-supplement-Supp_info.pdf [file NIHMS922652-supplement-Supp_info.pdf]

## Supplementary Information for

### TbSmee1 regulates hook complex morphology and the rate of flagellar pocket uptake in *Trypanosoma brucei*

Jenna A. Perry<sup>1</sup>, Amy N. Sinclair-Davis<sup>1</sup>, Michael R. McAllaster<sup>1\*</sup>, and Christopher L. de Graffenried<sup>1#</sup>

1. Department of Molecular Microbiology and Immunology, Brown University,  
Providence, RI, USA

**Running Title:** Hook complex biogenesis and function in *T. brucei*

**Key Words:** *Trypanosoma brucei*, cytoskeleton, cell cycle, flagellum, polo-like kinase,  
Flagellar pocket

#To whom correspondence should be addressed. E-mail:

[Christopher\\_degraffenried@Brown.edu](mailto:Christopher_degraffenried@Brown.edu). Phone: +1 (401) 863-9775

---

\* Current address: Department of Pathology and Immunology, Washington University  
School of Medicine, St. Louis, MO, USA

**Figure S1**

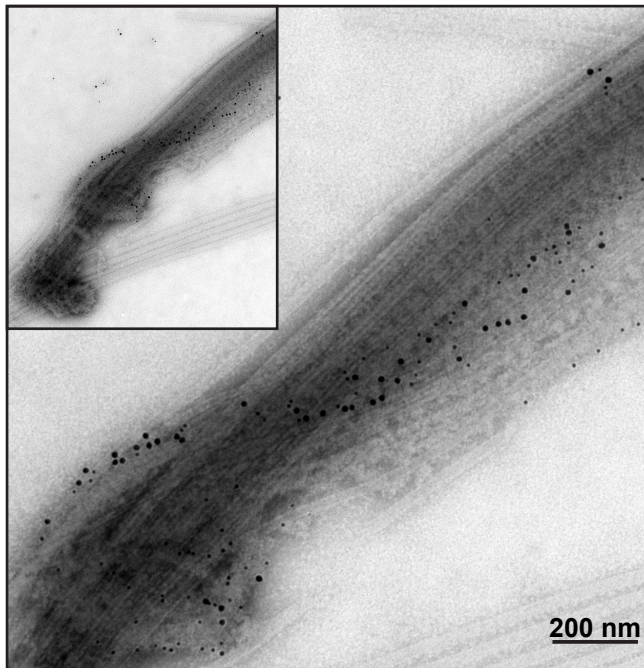

**15 nm gold beads = TbSmee1**  
**10 nm gold beads = TbMORN1**

**Figure S1** Dual immuno-electron microscopy with TbMORN1 confirms TbSmee1 localization to the HC shank. Flagella were isolated from 3×HA-TbSmee1 cells and then labeled with antibodies against HA, a biotin-conjugated secondary antibody, and 15 nm gold-conjugated streptavidin. TbMORN1 was labeled with anti-TbMORN1 followed by a 10 nm gold-conjugated secondary antibody. The labeled isolated flagella were negatively stained and examined by transmission electron microscopy.

## Figure S2

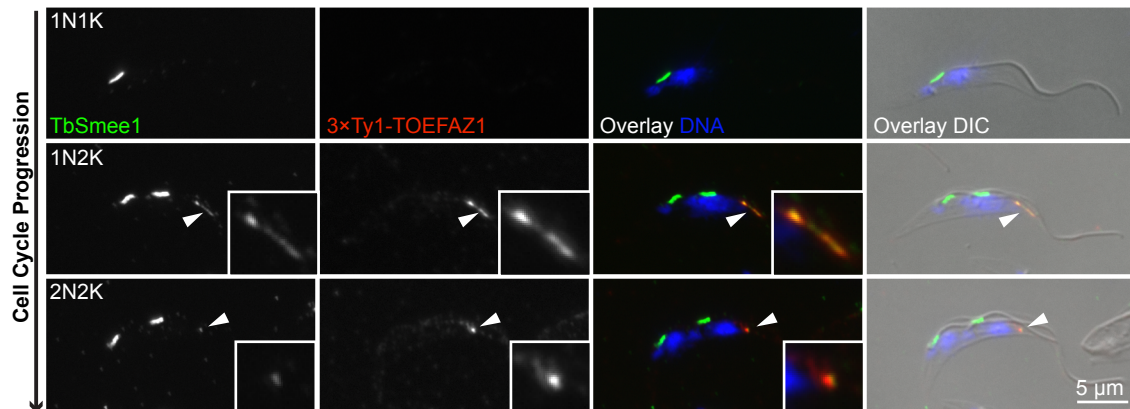

**Figure S2** TbSmee1 colocalizes with TOEFAZ1 at the new FAZ tip. Cells expressing endogenously tagged 3×Ty1- TOEFAZ1 were fixed and labeled with antibodies against TbSmee1 (TbSmee1; green) and Ty1 (3×Ty1- TOEFAZ1; red), along with DAPI to label the DNA (DNA; blue). The cells were visualized using fluorescence microscopy and DIC. The filled arrowheads depict the location of the new FAZ tip in a dividing cell and insets are three-fold magnification of the area surrounding new FAZ tip

**Figure S3**

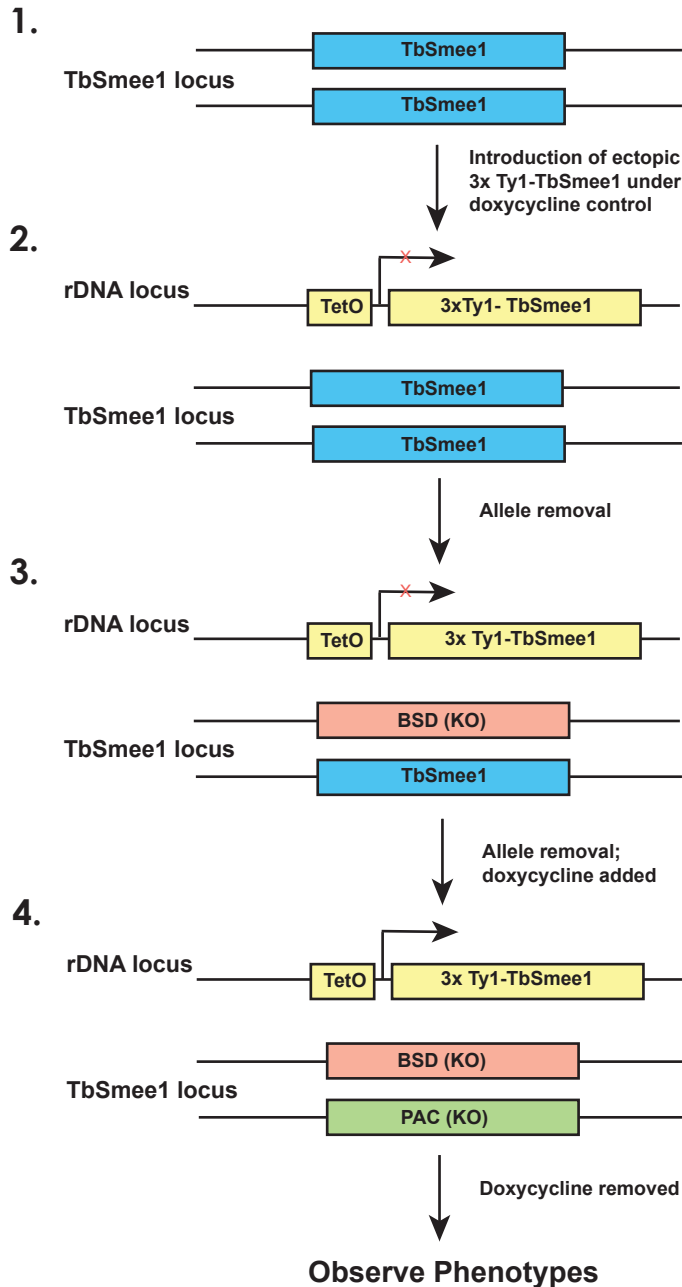

**Figure S3** Schematic of *TbSmee1* conditional knockout creation. Steps 1,2: *3xTy1-TbSmee1* was integrated into an ectopic rDNA locus and is under doxycycline control. Step 3: At the endogenous locus, one allele of *TbSmee1* was replaced with a blasticidin resistance cassette. Step 4: Expression of the ectopic copy of *3xTy1-TbSmee1* was induced through the addition of doxycycline and the remaining endogenous allele of *TbSmee1* was replaced with a puromycin resistance cassette. To observe the resultant phenotypes of *TbSmee1* depletion, doxycycline is removed from the culture medium, which turns off the expression of the ectopic *3xTy1-TbSmee1*.

## Figure S4

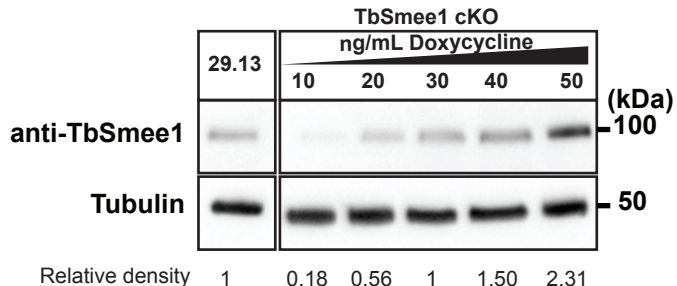

**Figure S4** Titration of doxycycline to match expression of ectopic 3×Ty1-TbSmee1 to endogenous levels. The TbSmee1 cKO cell line was grown in a variety of doxycycline concentrations before being collected for western blot analysis. The TbSmee1 cKO lysates and control *T. brucei* 29-13 lysates were separated by SDS-PAGE, transferred to nitrocellulose, and probed with rabbit anti-TbSmee1 and anti-tubulin as a loading control. The blot was analyzed semi-quantitatively to determine that 30 ng mL<sup>-1</sup> of doxycycline approximated endogenous levels of expression, so 35 ng mL<sup>-1</sup> was used in all following experiments to slightly overexpress TbSmee1 to ensure normal growth.

**Figure S5**

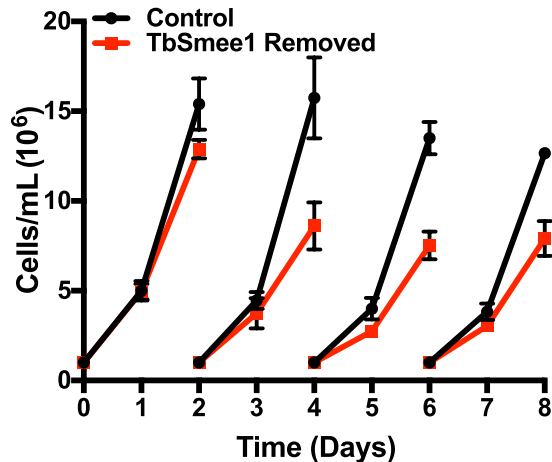

**Figure S5** TbSmee1-depletion leads to a 40% decrease in cell growth. TbSmee1 cKO cells were grown for 8 days in either the presence (Control) or absence (TbSmee1 Removed) of doxycycline. Cells from each culture were monitored by cell count, and cultures were re-seeded to starting densities every two days using either doxycycline- or vehicle- containing media. T0 represents the culture at the start of each experiment.

## Figure S6

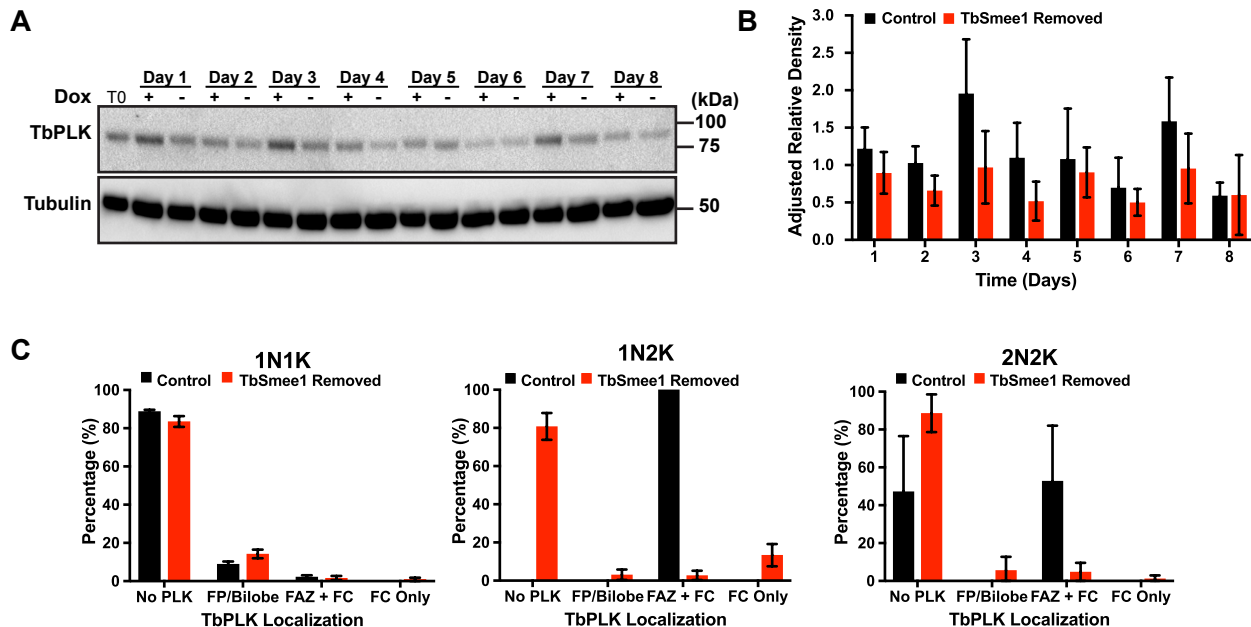

**Figure S6** TbPLK mislocalization is not due to change in protein expression (A) TbSmee1 cKO cells were grown for 8 days in either the presence (+) or absence (-) of doxycycline. Cells from each culture were monitored by cell count and collected daily to monitor for TbPLK expression by anti-TbPLK western blotting, using tubulin as a loading control. T0 represents the culture at the start of each experiment. (B) Semi-quantitative analysis of western blot for TbPLK expression in TbSmee1 cKOs. Values are normalized against anti-tubulin loading control and are relative to TbPLK expression at T0. Data are means  $\pm$  SD of three independent experiments. (C) Quantitation of TbPLK localization at 48 hours of TbSmee1 depletion. Data are means  $\pm$  SD of three independent experiments.

**Figure S7**

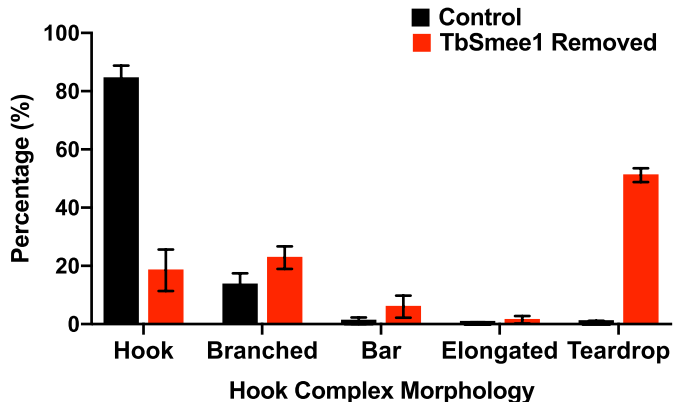

**Figure S7** TbSmee1 depletion for 2 days leads to altered HC morphology. Quantitation of HC morphology in non-dividing 1N1K control (Control) and TbSmee1-depleted cells (TbSmee1 Removed) for 2 days. Data are means  $\pm$  SD of three independent experiments.



**Figure S8**

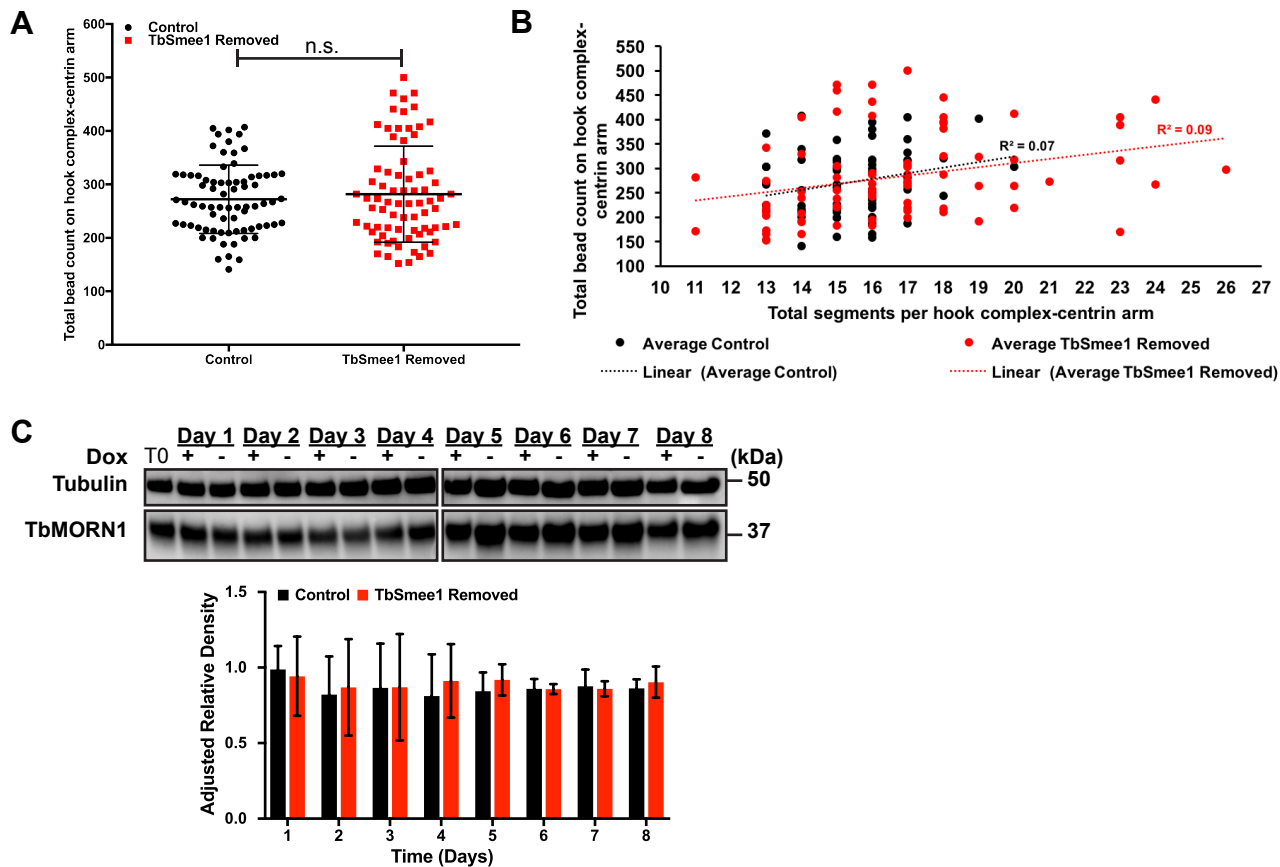

**Figure S8** Amount of TbMORN1 immunogold particles remains the same between control and TbSmee1-depleted cells independent of HC-centrin arm size. (A) Quantitation of total number of TbMORN1 immunogold particles on HC-centrin arms of control and TbSmee1-removed cells. Each marker represents one HC-centrin arm and the error bars indicate quartiles. n.s.; not significant (two-tailed unpaired Student's *t* test). (B) Correlation of total TbMORN1 immunogold particles on HC-centrin arm to total number of HC-centrin arm segments. Dotted lines indicate linear regressions. (C) TbSmee1 cKO cells were grown for 8 days in either the presence (+) or absence (-) of doxycycline. Cells from each culture were monitored by cell count and collected daily to monitor for TbMORN1 expression by anti-TbMORN1 western blotting, using tubulin as a loading control. T0 represents the culture at the start of each experiment. The TbMORN1 western blot was semi-quantitatively analyzed with the TbMORN1 values normalized against the anti-tubulin loading control and are relative to TbMORN1 expression at T0. Data are means  $\pm$  SD of three independent experiments.

## Figure S9

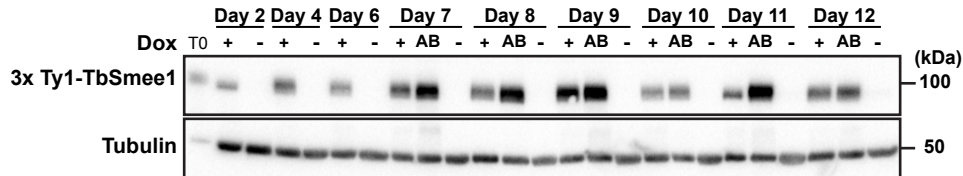

**Figure S9** Addition of doxycycline to TbSmee1- depleted cells restores expression of the ectopic 3×Ty1- TbSmee1 allele and leads to restored cell growth. (A) TbSmee1 cKO cells were treated with either doxycycline (Control; +) or vehicle control (TbSmee1 Removed; -) for 6 days before treating TbSmee1-depleted cells with doxycycline (AB; TbSmee1 Rescue) for an additional 6 days. Cells were monitored for cell growth, collected at the indicated intervals, and lysed for western blotting. The lysates were separated by SDS-PAGE, transferred to nitrocellulose, and blotted with anti-Ty1 and anti-tubulin (loading control) antibodies. Molecular weights in kDa are indicated on the right.

## Figure S10

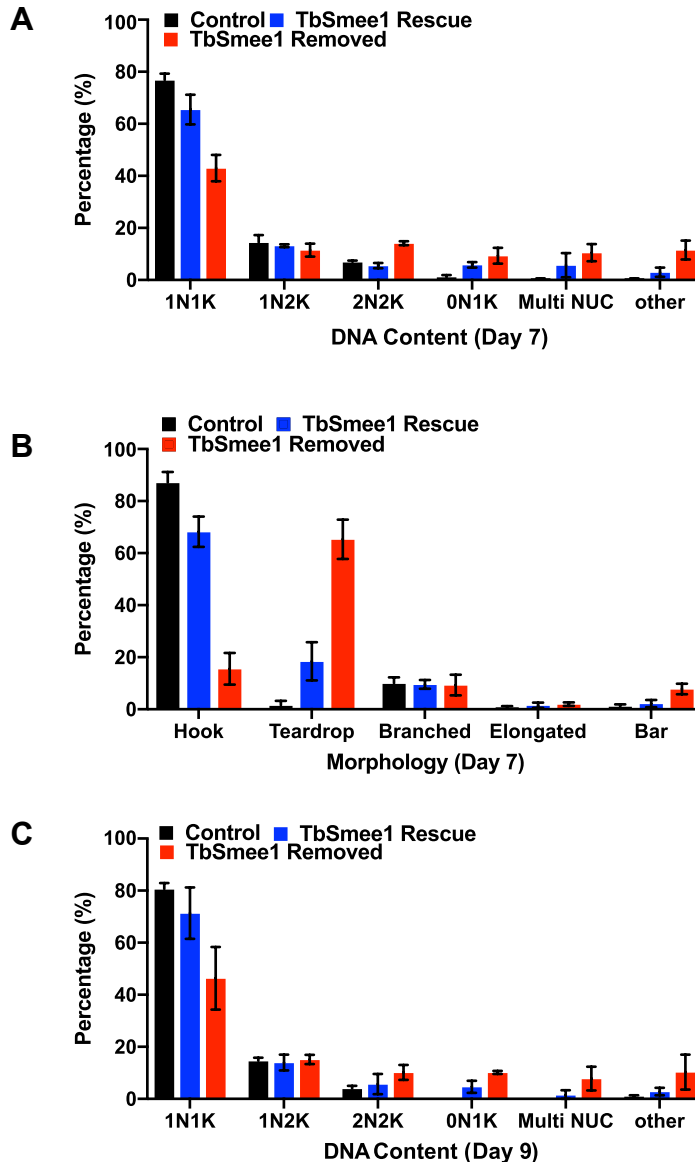

**Figure S10** Restoring TbSmeE1 expression leads to recovery of normal DNA content and hook complex morphology. (A) Quantitation of DNA content in control, TbSmeE1-rescued, and TbSmeE1 – depleted (TbSmeE1 Removed) cells on day 7 (one day after doxycycline addition) of experiment. Data are means  $\pm$  SD of three independent experiments. (B) Quantitation of hook complex morphologies in non-dividing 1N1K control, depleted TbSmeE1 (TbSmeE1 Removed) and rescued TbSmeE1 (TbSmeE1 Rescue) cells on day 7. Data are means  $\pm$  SD of three independent experiments. (C) Quantitation of DNA content in control, TbSmeE1-rescued, and TbSmeE1-depleted (TbSmeE1 Removed) cells on day 9 (three days post addition of doxycycline to rescue). Data are means  $\pm$  SD of three independent experiments.

**Figure S11**

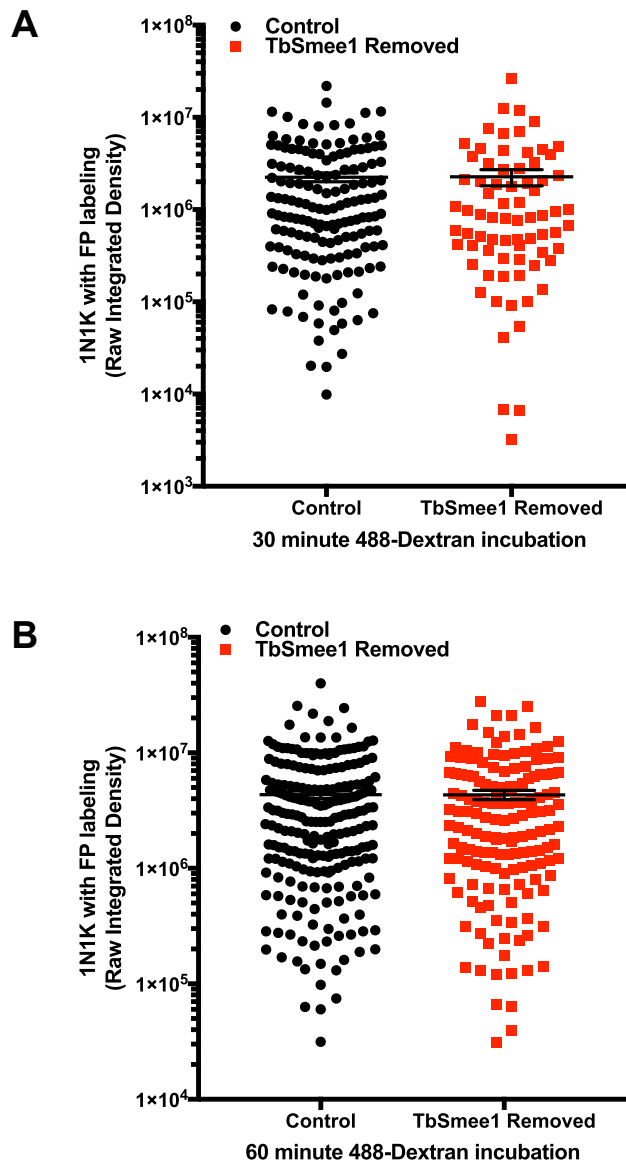

**Figure S11** TbSmee1-depleted cells take up the same amount of fluorescent dextran as control cells. (A) Quantitation of raw integrated density of fluorescence intensity in non-dividing 1N1K control and TbSmee1-removed cells after 30 minutes of incubation with dextran. Fluorescence intensity is plotted on a logarithmic scale and each marker represents one cell. Error bars are mean  $\pm$  SEM. (B) Quantitation of raw integrated density of fluorescence intensity in non-dividing 1N1K control and TbSmee1-removed cells after 60 minutes of incubation with dextran. Fluorescence intensity was plotted on a logarithmic scale and each marker represents one cell. Error bars are mean  $\pm$  SEM.

## Figure S12

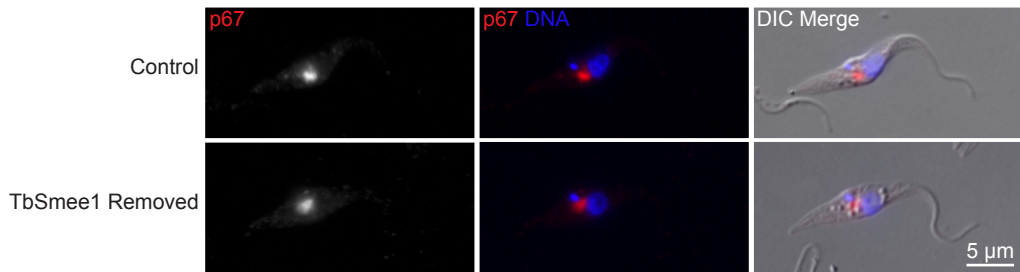

**Figure S12** Lysosomal marker p67 is not altered upon depletion of TbSmee1. Control cells (Control) and cells depleted of TbSmee1 for 6 days were fixed and labeled with anti-p67 (p67; red). DAPI was used to visualize DNA (DNA; blue) and the samples were imaged using fluorescence and DIC microscopy.

## Figure S13

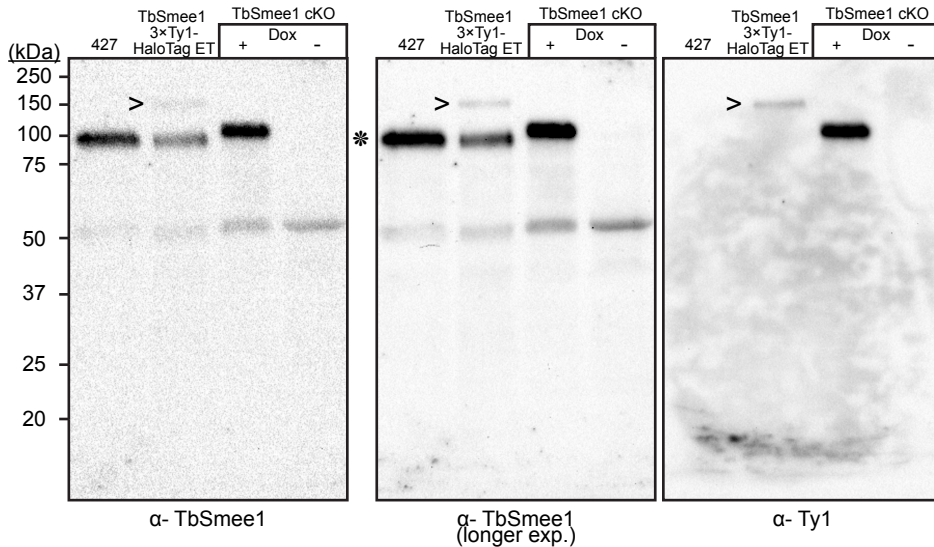

**Figure S13** Specificity of the rabbit anti-TbSmee1 polyclonal. Three cell lines were used to validate the anti-TbSmee1 polyclonal: *T. brucei* Lister 427 (427), a cell line with TbSmee1 endogenously tagged with HaloTag® (TbSmee1 3 $\times$ Ty1-HaloTag ET), and a cell line where the expression of TbSmee1 is under doxycycline control (TbSmee1 cKO). TbSmee1 cKO cell line was treated with either doxycycline (+) or vehicle control (-) for 6 days before lysates for western blotting were made. The lysates for all cell lines were separated using SDS-PAGE, transferred to nitrocellulose, then blotted with rabbit anti-TbSmee1. The membrane was then stripped and reprobed with anti-Ty1. Two exposures of the anti-TbSmee1 blot are shown to better display the HaloTagged protein (open arrowhead) and the endogenous protein (asterisk). Molecular weights are shown in kDa on the left.
